# Supplementary material for: Using a Hazard Quotient to Evaluate Pesticide Residues Detected in Pollen Trapped from Honey Bees (Apis mellifera) in Connecticut
Source: PLoS One. 2013 Oct 15;8(10):e77550. doi: 10.1371/journal.pone.0077550 (PMC3797043; doi:10.1371/journal.pone.0077550)
Supplement: Table S3 — Hamden. Count of number of detections (of the total samples analyzed), maximum residue measured (in ppb), and the Maximum Pollen Hazard Quotient = maximum residue (ppb) ÷ contact LD50 (ug/bee) for each year of sampling and over all years. (DOCX) [file pone.0077550.s003.docx]

Table S3. Hamden. Count of number of detections (of the total samples analyzed), maximum residue measured (in ppb), and the Maximum Pollen Hazard Quotient = maximum residue (ppb) ÷ contact LD50 (ug/bee) for each year of sampling and over all years. When no contact LD50 for the compound was available, the cell for Max PHQ contact was left blank. Contact LD50 values are from the sources cited in Table 1.

|  | **Over all years** | | | **2007** | | | **2008** | | | **2009** | | | **2010** | | | **2011** | | |
| --- | --- | --- | --- | --- | --- | --- | --- | --- | --- | --- | --- | --- | --- | --- | --- | --- | --- | --- |
| **Pesticide** | **Count (out of 114)** | **Max. (ppb)** | **Max PHQ contact** | **Count (out of 37)** | **Max. (ppb)** | **Max PHQ contact** | **Count (out of 18)** | **Max. (ppb)** | **Max PHQ contact** | **Count (out of 16)** | **Max. (ppb)** | **Max PHQ contact** | **Count (out of 18)** | **Max. (ppb)** | **Max PHQ contact** | **Count (out of 25)** | **Max. (ppb)** | **Max PHQ contact** |
| Alachlor | 3 | 124 | 3.43 | 0 | 0 | 0.00 | 1 | 15 | 0.41 | 2 | 124 | 3.43 | 0 | 0 | 0.00 | 0 | 0 | 0.00 |
| Atrazine | 24 | 11 | 0.11 | 8 | 5.8 | 0.06 | 8 | 11 | 0.11 | 5 | 1.8 | 0.02 | 2 | 2.6 | 0.03 | 1 | 0.5 | 0.01 |
| Azinphos-methyl | 5 | 122 | 290 | 2 | 5 | 11.90 | 0 | 0 | 0.00 | 1 | 7.8 | 18.57 | 2 | 122 | 290 | 0 | 0 | 0.00 |
| Azoxystrobin | 10 | 21 | 0.11 | 1 | 1 | 0.01 | 0 | 0 | 0.00 | 2 | 21 | 0.11 | 4 | 4.1 | 0.02 | 3 | 3.3 | 0.02 |
| Bentazon | 2 | 7.2 | 0.04 | 0 | 0 | 0.00 | 0 | 0 | 0.00 | 0 | 0 | 0.00 | 2 | 7.2 | 0.04 | 0 | 0 | 0.00 |
| Boscalid | 16 | 848 | 4.24 | 1 | 848 | 4.24 | 1 | 2.2 | 0.01 | 4 | 17 | 0.09 | 5 | 24.4 | 0.12 | 5 | 16 | 0.08 |
| Bromacil | 1 | 4 | 0.36 | 0 | 0 | 0.00 | 0 | 0 | 0.00 | 0 | 0 | 0.00 | 1 | 4 | 0.36 | 0 | 0 | 0.00 |
| Carbaryl | 36 | 78 | 70.91 | 16 | 60 | 54.55 | 5 | 78 | 70.91 | 4 | 26 | 23.64 | 6 | 43 | 39.09 | 5 | 15 | 13.64 |
| Carbendazim | 35 | 200 | 4.00 | 6 | 1.8 | 0.04 | 7 | 55 | 1.10 | 9 | 74 | 1.48 | 7 | 200 | 4.00 | 6 | 108 | 2.16 |
| Carbofuran | 1 | 2.8 | 17.50 | 1 | 2.8 | 17.50 | 0 | 0 | 0.00 | 0 | 0 | 0.00 | 0 | 0 | 0.00 | 0 | 0 | 0.00 |
| Chlorpyrifos | 7 | 12.1 | 1210 | 1 | 3.9 | 390 | 2 | 4.5 | 450 | 1 | 12.1 | 1210 | 2 | 10.5 | 1050 | 1 | 4.7 | 470 |
| Coumaphos | 73 | 163 | 6.79 | 37 | 19.8 | 0.83 | 18 | 7.7 | 0.32 | 2 | 163 | 6.79 | 10 | 2.8 | 0.12 | 6 | 3.3 | 0.14 |
| Coumaphos Oxonb | 1 | 27 |  | 0 | 0 |  | 0 | 0 |  | 1 | 27 |  | 0 | 0 |  | 0 | 0 |  |
| Cyprodinil | 4 | 14 | 0.02 | 0 | 0 | 0.00 | 0 | 0 | 0.00 | 0 | 0 | 0.00 | 0 | 0 | 0.00 | 4 | 14 | 0.02 |
| Difenconazole | 3 | 15 | 0.15 | 0 | 0 | 0.00 | 0 | 0 | 0.00 | 0 | 0 | 0.00 | 0 | 0 | 0.00 | 3 | 15 | 0.15 |
| Dithiopyr | 17 | 12 | 0.15 | 0 | 0 | 0.00 | 5 | 12 | 0.15 | 4 | 4.5 | 0.06 | 0 | 0 | 0.00 | 8 | 6.7 | 0.08 |
| Fenbuconazole | 5 | 396 | 1.36 | 0 | 0 | 0.00 | 0 | 0 | 0.00 | 0 | 0 | 0.00 | 1 | 12.5 | 0.04 | 4 | 396 | 1.36 |
| Fenhexamid | 1 | 17 | 0.08 | 0 | 0 | 0.00 | 1 | 17 | 0.08 | 0 | 0 | 0.00 | 0 | 0 | 0.00 | 0 | 0 | 0.00 |
| Fenthion | 4 | 26 | 84.42 | 4 | 26 | 84.42 | 0 | 0 | 0.00 | 0 | 0 | 0.00 | 0 | 0 | 0.00 | 0 | 0 | 0.00 |
| Fluvalinate | 1 | 40 | 200 | 0 | 0 | 0.00 | 0 | 0 | 0.00 | 1 | 40 | 200 | 0 | 0 | 0.00 | 0 | 0 | 0.00 |
| Imidacloprid | 9 | 7.2 | 164 | 0 | 0 | 0.00 | 4 | 7.2 | 164 | 1 | 1.9 | 43.28 | 0 | 0 | 0.00 | 4 | 4.9 | 112 |
| Indoxacarba | 4 | 417 | 5957 | 0 | 0 | 0.00 | 0 | 0 | 0.00 | 0 | 0 | 0.00 | 4 | 417 | 5957 | 0 | 0 | 0.00 |
| Malathion | 2 | 13.4 | 67.00 | 0 | 0 | 0.00 | 0 | 0 | 0.00 | 2 | 13.4 | 67.00 | 0 | 0 | 0.00 | 0 | 0 | 0.00 |
| Metalaxyl | 2 | 5.4 | 0.05 | 0 | 0 | 0.00 | 0 | 0 | 0.00 | 0 | 0 | 0.00 | 0 | 0 | 0.00 | 2 | 5.4 | 0.05 |
| Methomyl | 1 | 24 | 150 | 1 | 24 | 150 | 0 | 0 | 0.00 | 0 | 0 | 0.00 | 0 | 0 | 0.00 | 0 | 0 | 0.00 |
| Myclobutanil | 4 | 60 | 0.17 | 1 | 16 | 0.04 | 1 | 60 | 0.17 | 0 | 0 | 0.00 | 2 | 57 | 0.16 | 0 | 0 | 0.00 |
| Napropamideb | 10 | 29.7 |  | 4 | 2.4 |  | 1 | 2.6 |  | 4 | 12.7 |  | 1 | 29.7 |  | 0 | 0 |  |
| Oxadiazon | 1 | 6.2 | 0.25 | 0 | 0 | 0.00 | 0 | 0 | 0.00 | 1 | 6.2 | 0.25 | 0 | 0 | 0.00 | 0 | 0 | 0.00 |
| Oxyflourfen | 1 | 18 | 0.18 | 1 | 18 | 0.18 | 0 | 0 | 0.00 | 0 | 0 | 0.00 | 0 | 0 | 0.00 | 0 | 0 | 0.00 |
| Pendimethalin | 10 | 87 | 1.75 | 0 | 0 | 0.00 | 3 | 87 | 1.75 | 0 | 0 | 0.00 | 5 | 39 | 0.78 | 2 | 25 | 0.50 |
| Phosmeta | 54 | 16556 | 75255 | 8 | 7.9 | 35.91 | 8 | 750 | 3409 | 12 | 540 | 2455 | 9 | 113 | 514 | 17 | 16556 | 75255 |
| Propyzamide | 2 | 94 | 0.52 | 0 | 0 | 0.00 | 0 | 0 | 0.00 | 0 | 0 | 0.00 | 0 | 0 | 0.00 | 2 | 94 | 0.52 |
| Pyraclostrobin | 5 | 67 | 0.67 | 0 | 0 | 0.00 | 0 | 0 | 0.00 | 0 | 0 | 0.00 | 3 | 67 | 0.67 | 2 | 12.8 | 0.13 |
| Pyrimethanil | 3 | 25 | 0.25 | 2 | 24 | 0.24 | 1 | 25 | 0.25 | 0 | 0 | 0.00 | 0 | 0 | 0.00 | 0 | 0 | 0.00 |
| Simazine | 9 | 13 | 0.13 | 1 | 1.3 | 0.01 | 2 | 13 | 0.13 | 6 | 12 | 0.12 | 0 | 0 | 0.00 | 0 | 0 | 0.00 |
| Thiabendazole | 3 | 4.1 | 1.03 | 0 | 0 | 0.00 | 3 | 4.1 | 1.03 | 0 | 0 | 0.00 | 0 | 0 | 0.00 | 0 | 0 | 0.00 |
| Thiacloprid | 4 | 68 | 1.80 | 0 | 0 | 0.00 | 0 | 0 | 0.00 | 0 | 0 | 0.00 | 0 | 0 | 0.00 | 4 | 68 | 1.80 |
| Thiamethoxam | 2 | 2.9 | 121 | 0 | 0 | 0.00 | 0 | 0 | 0.00 | 1 | 1.5 | 62.50 | 1 | 2.9 | 121 | 0 | 0 | 0.00 |
| Thiophanate-methyl | 5 | 30 | 0.30 | 0 | 0 | 0.00 | 1 | 13 | 0.13 | 0 | 0 | 0.00 | 2 | 30 | 0.30 | 2 | 21 | 0.21 |
| Trifloxystrobin | 9 | 160 | 0.80 | 2 | 6.3 | 0.03 | 0 | 0 | 0.00 | 4 | 160 | 0.80 | 3 | 6.5 | 0.03 | 0 | 0 | 0.00 |
|  |  |  |  |  |  |  |  |  |  |  |  |  |  |  |  |  |  |  |
|  |  |  |  |  |  |  |  |  |  |  |  |  |  |  |  |  |  |  |

a Maximum Pollen Hazard Quotient based on the contact LD50 from Agritox database [6].

b No contact LD50 available.
